# Supplementary material
Source: PubMed Central journal article supplement (PMC3708646)

# Supplemental Material

Fig. S1. RNA and metabolite levels for TCA and glyoxylate cycle genes. The metabolite and RNA levels for *snf1Δ* (A), *adr1Δ* (B), *cat8Δ* (C), and *adr1Δcat8Δ* (D) were normalized to those observed in wildtype and incorporated with RNA data, also normalized to wildtype. The RNA levels were derived from previously published work [27].

Fig. S2. RNA and metabolite levels for gluconeogenesis. The metabolite and RNA levels for *snf1Δ* (A), *adr1Δ* (B), *cat8Δ* (C), and *adr1Δcat8Δ* (D) were normalized to those observed in wildtype and incorporated with RNA data, also normalized to wildtype. The RNA levels were derived from previously published work [27].

# FIGURE S1A

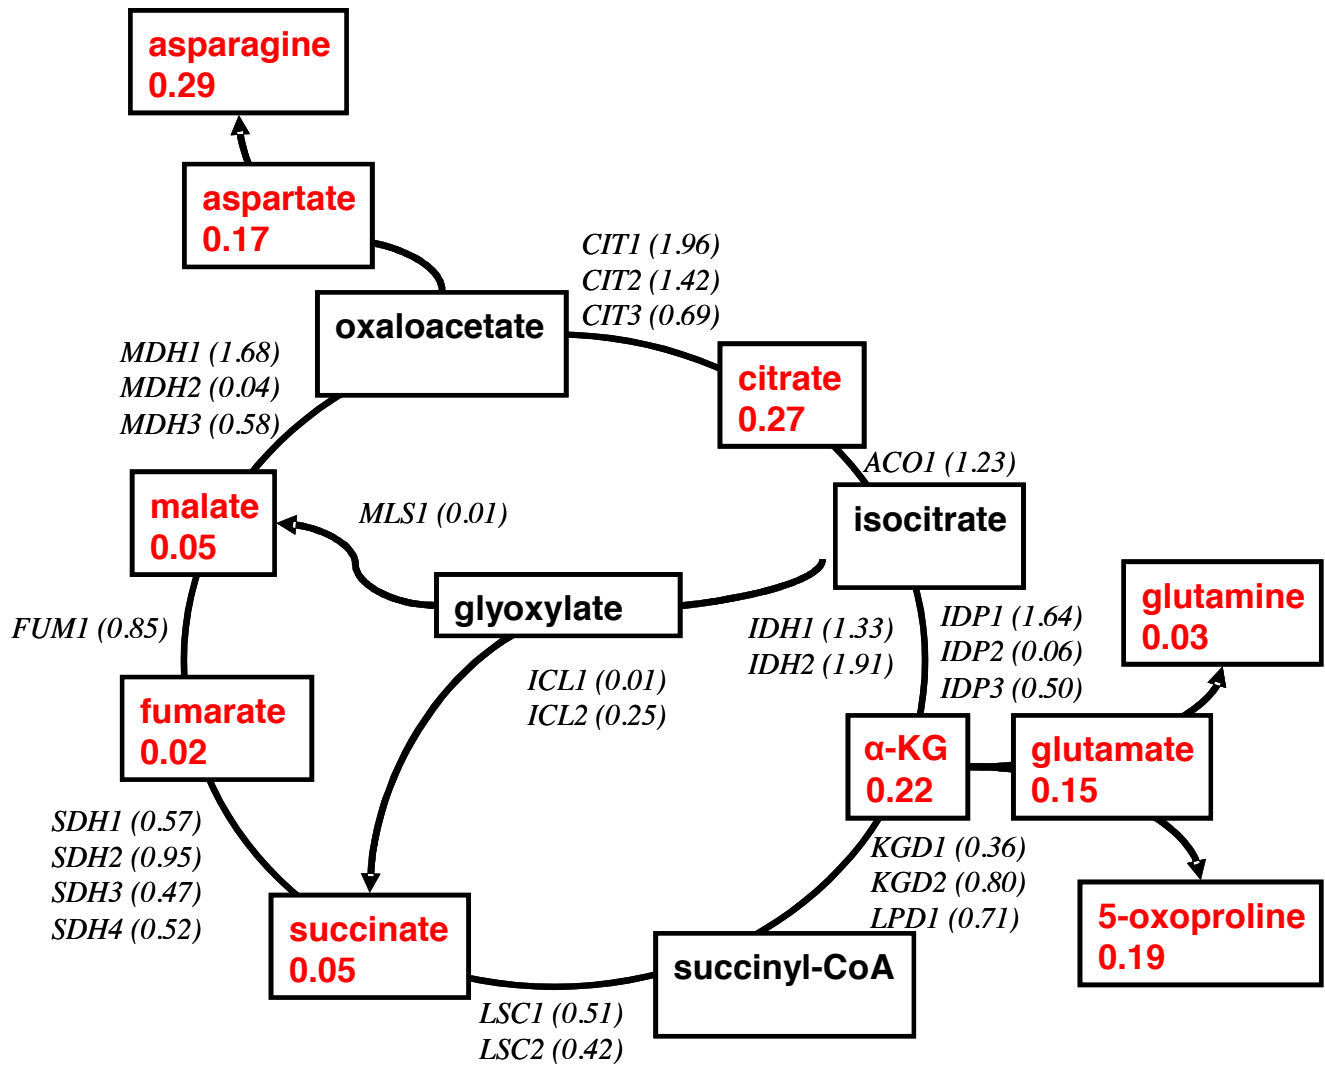

# FIGURE S1B

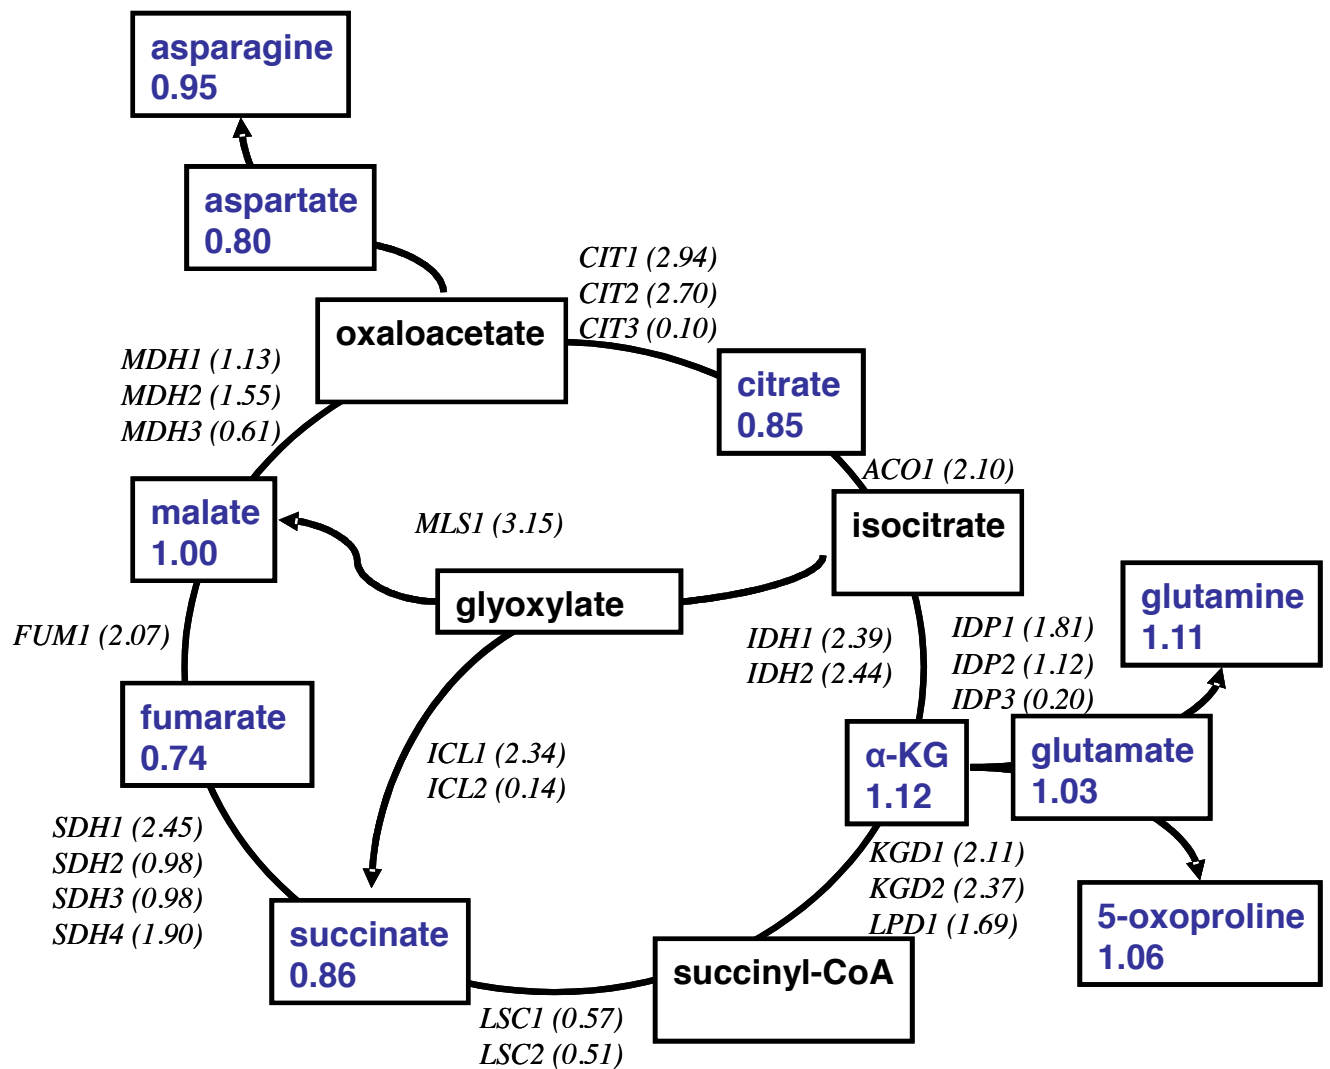

# FIGURE S1C

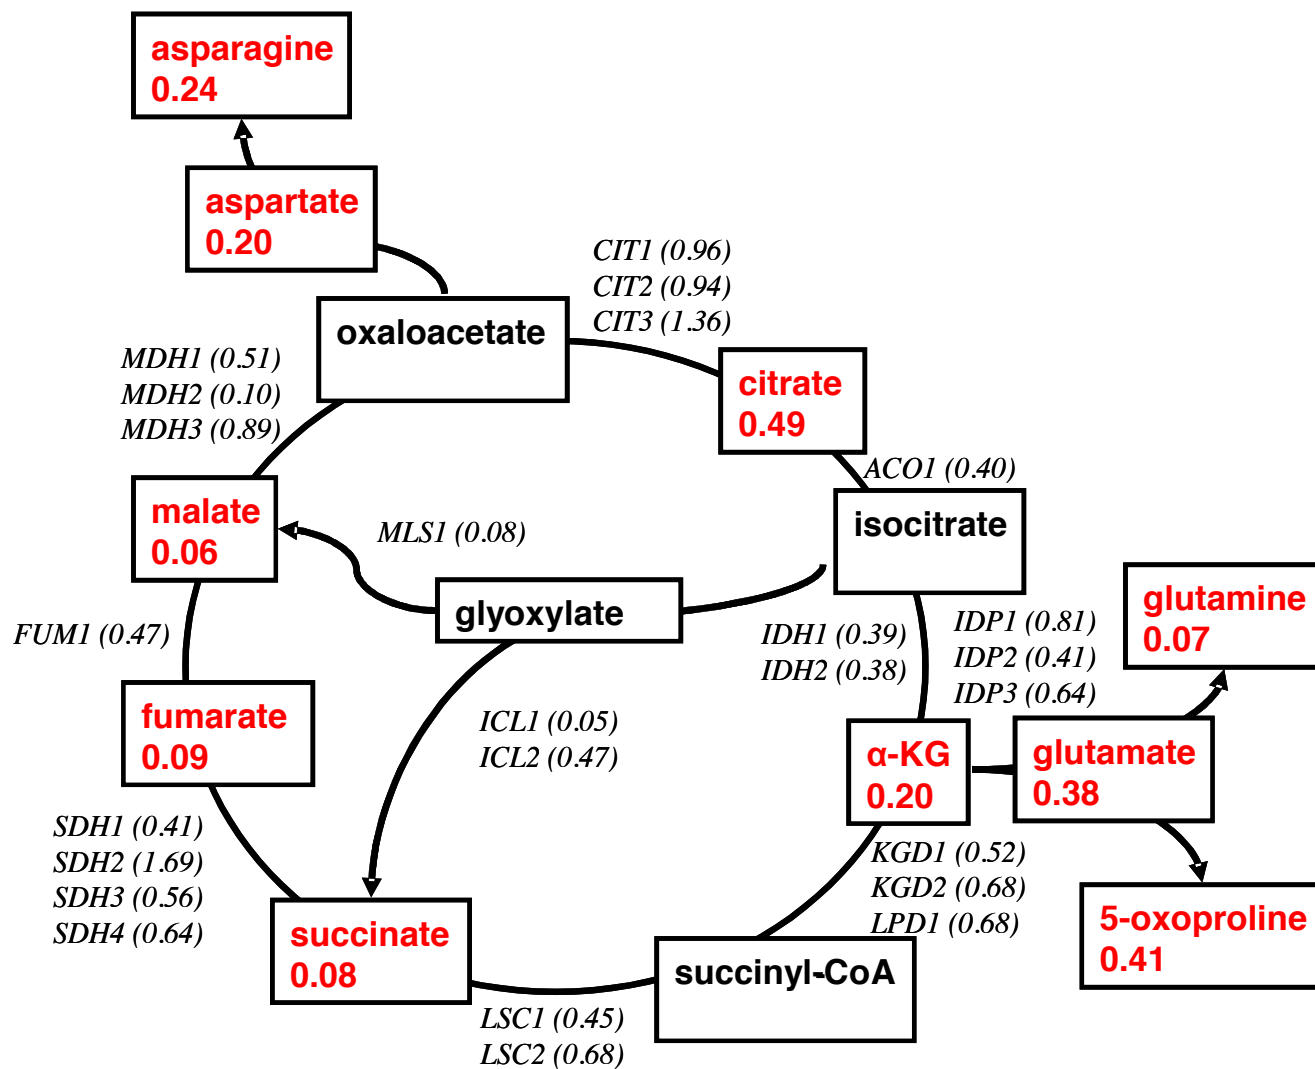

# FIGURE S1D

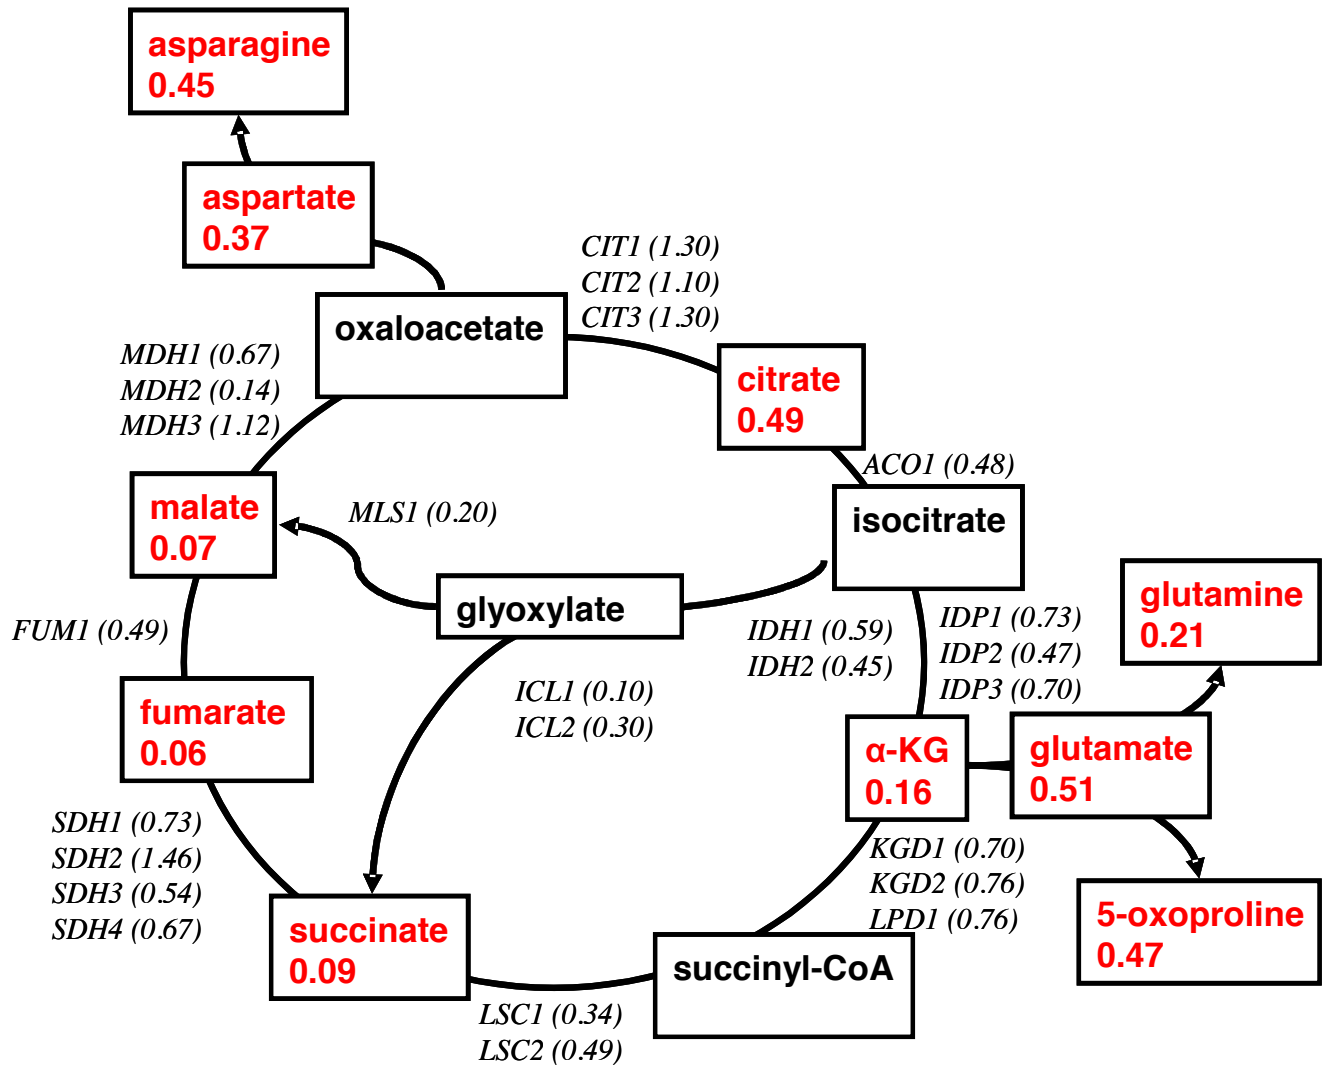

# FIGURE S2A

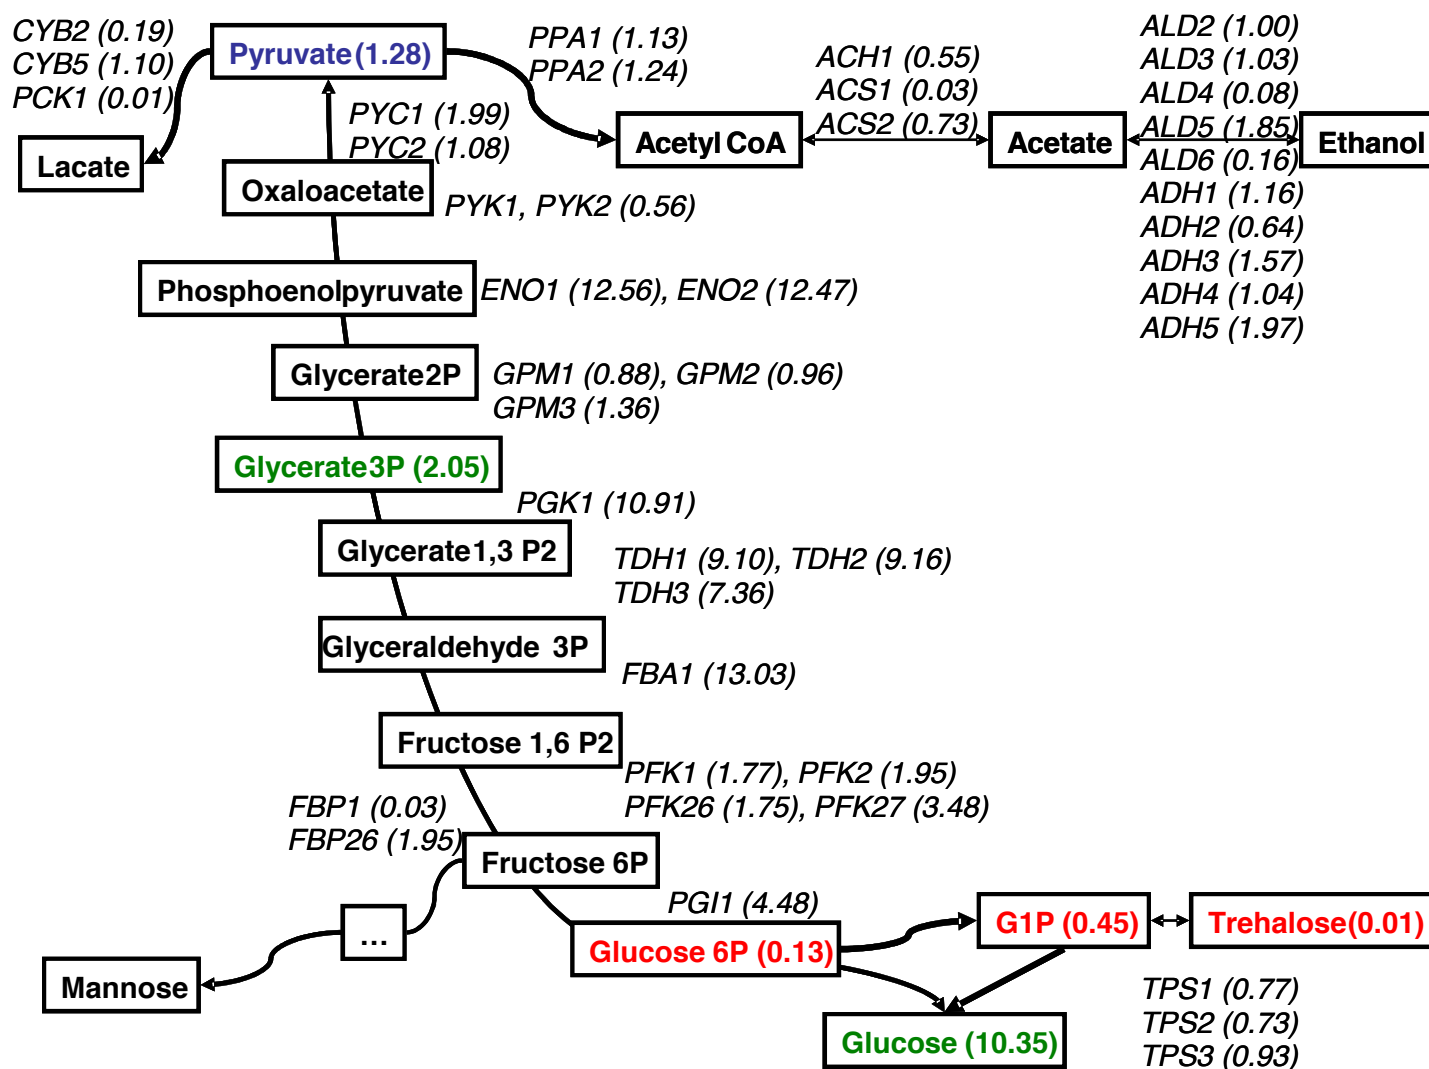

# FIGURE S2B

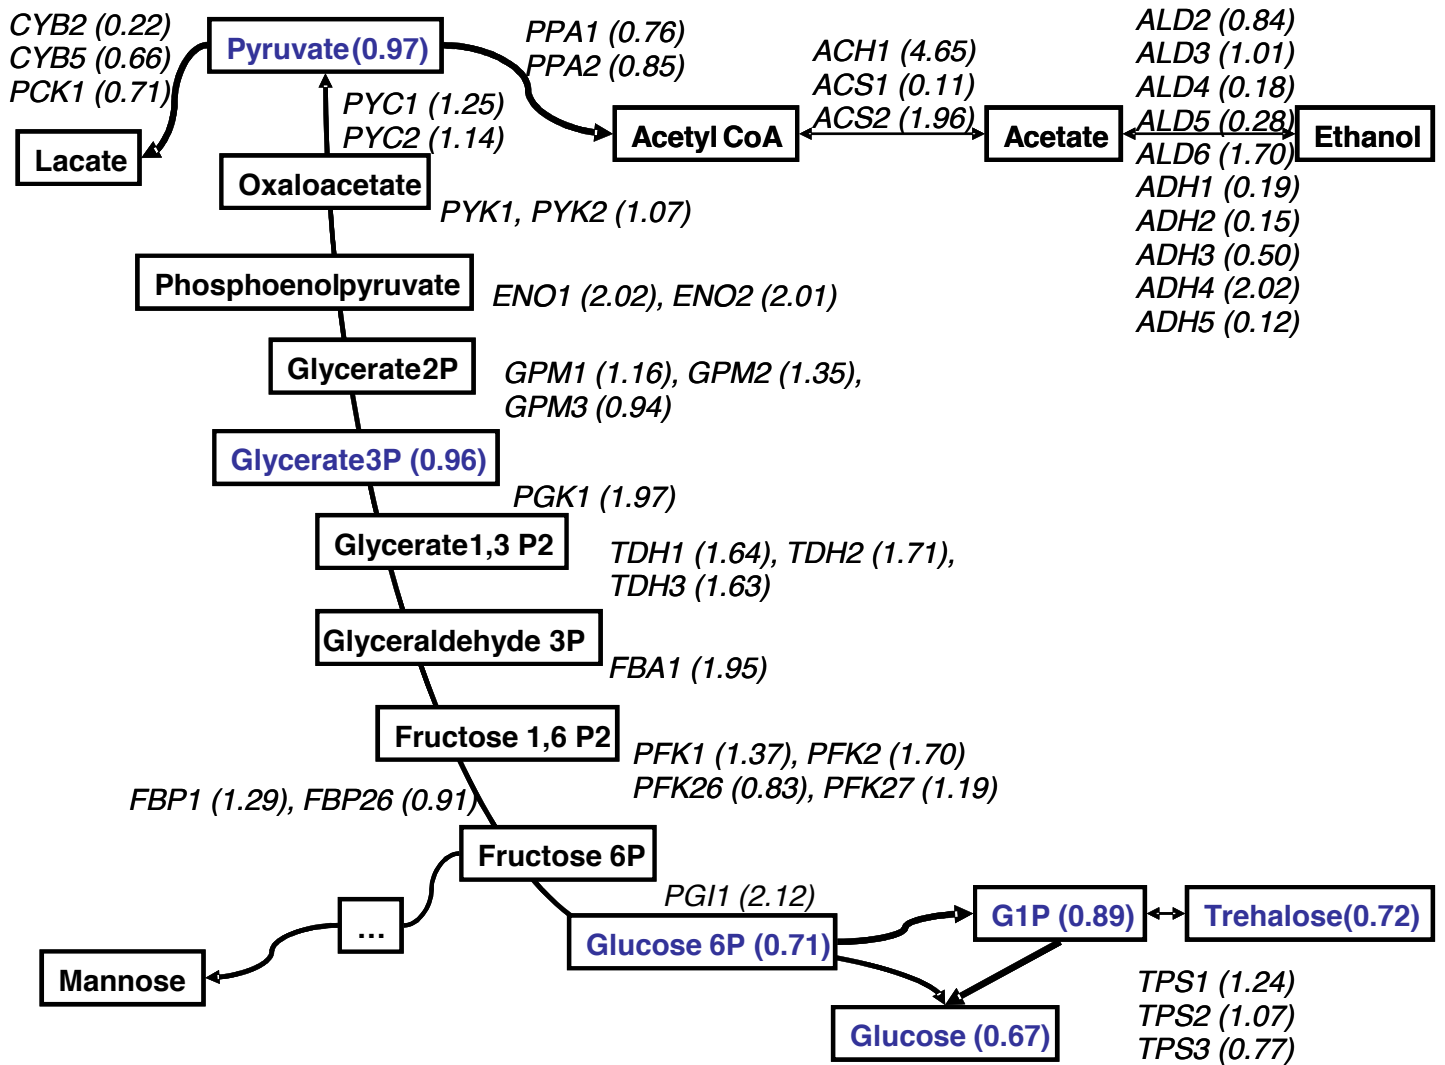

# FIGURE S2C

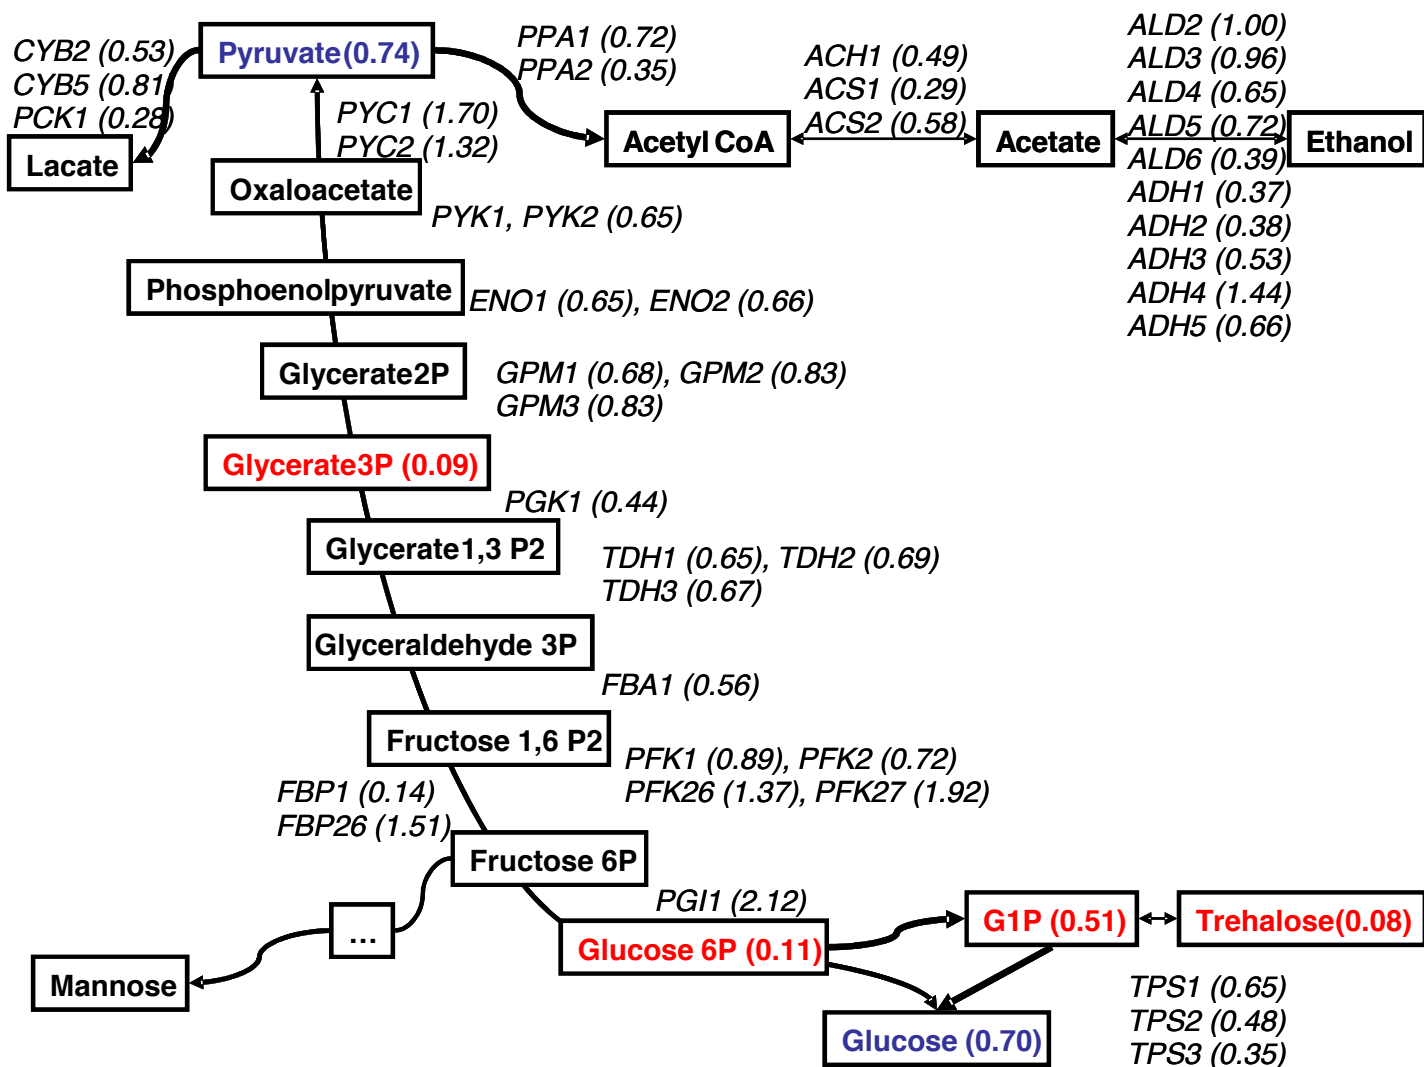



# FIGURE S2D

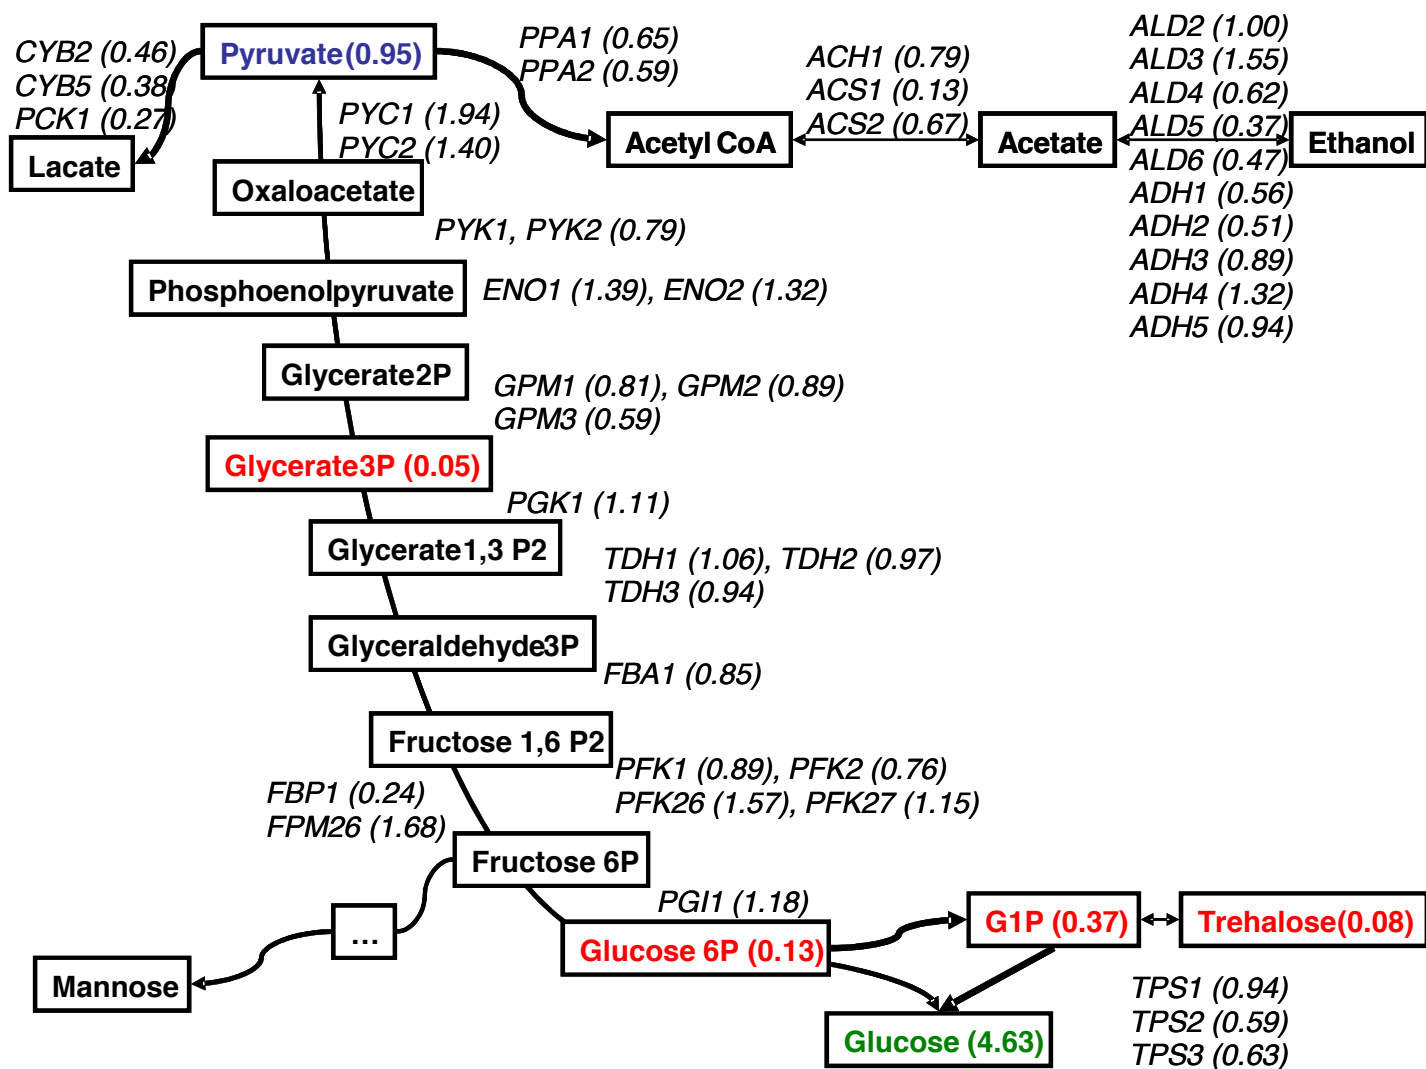

Supplement: NIHMS387906-supplement-supp_data.pdf [file NIHMS387906-supplement-supp_data.pdf]
